# Supplementary material for: Identification of CD8+ T cell-related biomarkers and immune infiltration characteristic of rheumatoid arthritis
Source: publisher site journal article supplement (doi:10.18632/aging.205435), 2024-01-16
Supplement: Supplementary file [file aging-v16i2-205435-supplementary-material-SD1.pdf]

## SUPPLEMENTARY TABLE

**Supplementary Table 1. The primer sequence for genes.**

---

|       |                |                      |
|-------|----------------|----------------------|
| GDF15 | Forward primer | GCAAGAACTCAGGACGGTGA |
|       | Reverse primer | TGGAGTCTTCGGAGTGCAAC |
| IGHM  | Forward primer | AGATGGTCTGCTTCAGTGGC |
|       | Reverse primer | AGCTGTGAAAACCCACACCA |
| IGLC1 | Forward primer | CCCACTGTCACTCTGTTCCC |
|       | Reverse primer | CCGCGTACTTGTTGTTGCTC |

---
